# Supplementary material
Source: Springer Nature journal article supplement (https://www.springermedizin.de/resource/supplementary/12936_2010_1686_MOESM3_ESM.pdf/9542380)

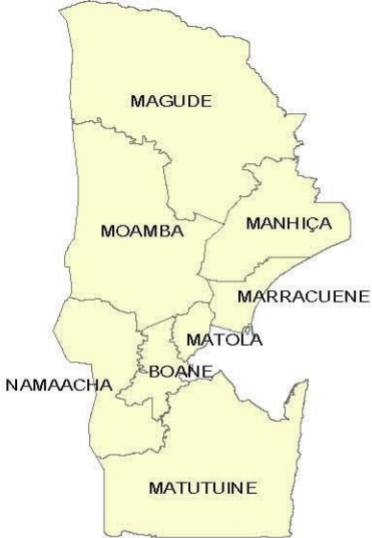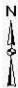

Scale bar: 1:1,500,000

Supplement: MOESM3 [file 9542380]
